# Supplementary material for: Development of an Image Analysis-Based Prognosis Score Using Google’s Teachable Machine in Melanoma
Source: MDPI journal article supplement (doi:10.3390/cancers14092243), 2022-04-29
Supplement: s1 [file s1]

**a**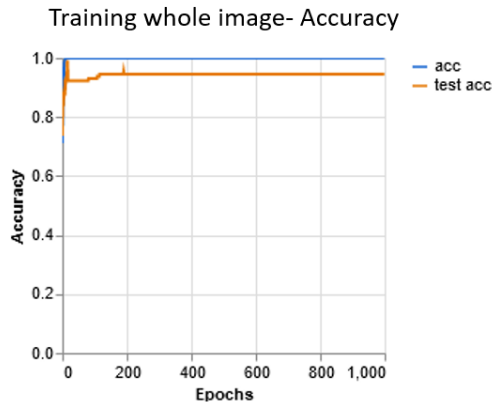**b**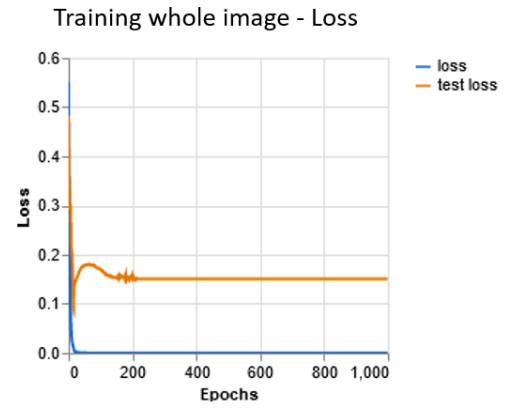**c**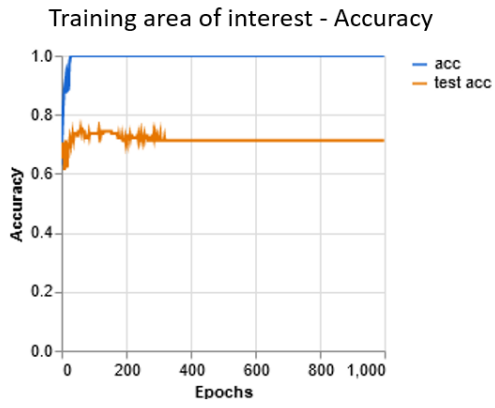**d**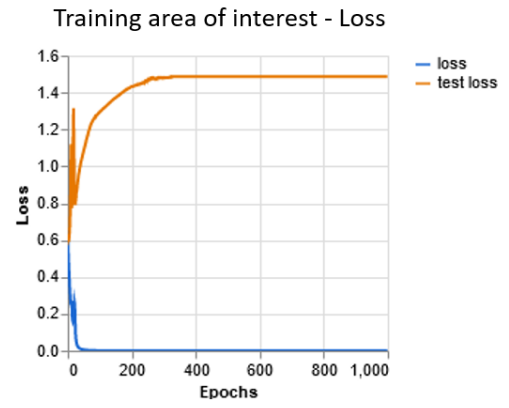

**Figure S1.** Training curves for accuracy (a+c) and loss (b+d). (a,b): Training curves for analysis of whole images. (c,d): Training curves for analysis of area of interest.

**a**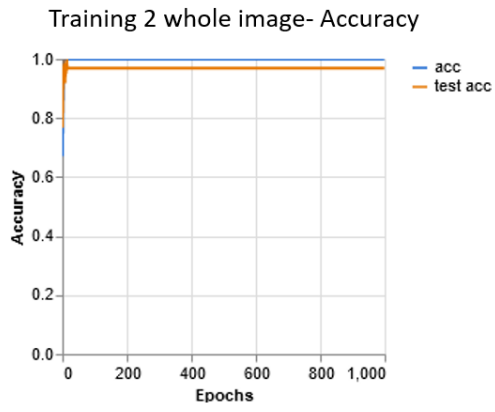**b**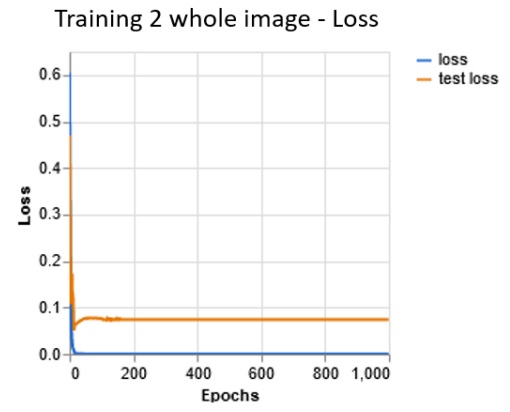**c**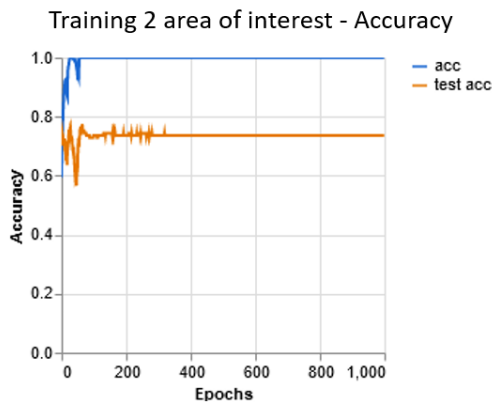**d**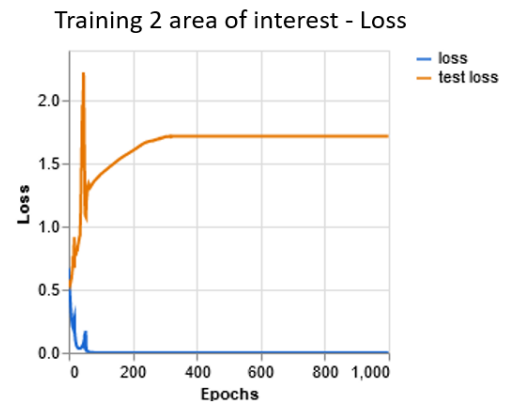

**Figure S2.** Training curves of repeated training for accuracy (a+c) and loss (b+d). **(a,b):** Training curves for analysis of whole images. **(c,d):** Training curves for analysis of area of interest.
